# Supplementary material for: Improved methanogenesis from aqueous pyrolysis liquid (APL) by inoculum selection and pre-ozonation
Source: Royal Society of Chemistry journal article supplement (doi:10.1039/d3ew00768e), 2024-01-01
Supplement: d3ew00768e3.pdf [file d3ew00768e3.pdf]

1 **Supplementary Material**

2

3 **Table S1.** Percent of total organic compounds peak area detected in 500 °C and 700 °C

4 APL by GC-MS. Compounds sorted in increasing order of the molar mass.

| Compounds                         | Molar mass (g/mol) | % of total organic compound peak area detected |                         |
|-----------------------------------|--------------------|------------------------------------------------|-------------------------|
|                                   |                    | Non-ozonated 500 °C APL                        | Non-ozonated 700 °C APL |
| Acetonitrile                      | 41.05              | 2.4                                            | 14.74                   |
| Propanenitrile                    | 55.08              | 0.7                                            | 2.59                    |
| Acetamide                         | 59.07              | 17.0                                           | 19.06                   |
| Acetic acid                       | 60.06              | 15.1                                           | -                       |
| Pyrrrole                          | 67.09              | 0.5                                            | 3.49                    |
| 1H-Imidazole                      | 68.08              | -                                              | 1.25                    |
| 2-Propenamide                     | 71.08              | -                                              | 0.77                    |
| Propanamide                       | 73.09              | 3.2                                            | 2.53                    |
| Acetamide, N-methyl-              | 73.09              | 1.6                                            | 1.32                    |
| Propionic acid                    | 74.08              | 1.7                                            | -                       |
| 1-Butanol                         | 74.12              | 1.3                                            | 0.8                     |
| Pyridine                          | 79.10              | 1.2                                            | 3.93                    |
| 1,3-Diazine                       | 80.09              | -                                              | 0.57                    |
| 1H-Pyrazole, 3-methyl-            | 82.10              | 0.6                                            | -                       |
| 1H-Imidazole, 4-methyl-           | 82.10              | -                                              | 1.9                     |
| trans-Crotonamide                 | 85.10              | -                                              | 0.71                    |
| 2-Pyrrolidinone                   | 85.11              | 3.0                                            | 2.52                    |
| Acetamide, N,N-dimethyl-          | 87.12              | 0.8                                            | 0.56                    |
| Propanoic acid, 2-methyl-         | 88.11              | 1.0                                            | -                       |
| Glycerin                          | 92.09              | 1.3                                            | -                       |
| Pyridine, 2-methyl-               | 93.13              | -                                              | 1.65                    |
| Pyridine, 3-methyl-               | 93.13              | -                                              | 0.86                    |
| 2-Aminopyridine                   | 94.11              | 0.5                                            | -                       |
| 3-Aminopyridine                   | 94.11              | 2.0                                            | 4.92                    |
| Phenol                            | 94.11              | -                                              | 2.08                    |
| Pyrazine, methyl-                 | 94.11              | -                                              | 1.65                    |
| 2-Aminopyridine                   | 94.11              | -                                              | 0.75                    |
| Pyrimidine, 2-methyl-             | 94.11              | -                                              | 0.72                    |
| 2(1H)-Pyridinone                  | 95.10              | 0.5                                            | 1.42                    |
| 3-Pyridinol                       | 95.10              | 3.7                                            | 4                       |
| 1H-Imidazole, 2,4-dimethyl-       | 96.13              | -                                              | 1.44                    |
| 3-Dimethylaminoacrylonitrile      | 96.13              | -                                              | 0.57                    |
| 2-Furanmethanol                   | 98.10              | -                                              | 1.33                    |
| 2,5-Pyrrolidinedione              | 99.09              | 1.6                                            | 1.66                    |
| 2-Piperidinone                    | 99.13              | 1.2                                            | -                       |
| Butanamide, 3-methyl-             | 101.2              | 1.0                                            | 0.59                    |
| Phenol, 4-methyl-                 | 108.1              | 0.8                                            | 1.31                    |
| 2-Pyridinamine, 5-methyl-         | 108.1              | -                                              | 1.03                    |
| Pyrimidine, 4,6-dimethyl-         | 108.1              | -                                              | 0.95                    |
| 4-Pyridinemethanol                | 109.1              | 3.5                                            | -                       |
| 3-Pyridinol, 2-methyl-            | 109.1              | 0.6                                            | 1.03                    |
| 3-Pyridinol, 6-methyl-            | 109.1              | -                                              | 2.91                    |
| 2-Amino-4-methylpyrimidine        | 109.1              | -                                              | 0.44                    |
| 2(1H)-Pyridinone, 3-methyl-       | 109.1              | -                                              | 0.6                     |
| Pyrrrole-2-carboxamide            | 110.1              | 0.8                                            | -                       |
| 2(1H)Pyrimidinone, 1-methyl-      | 110.1              | 0.5                                            | -                       |
| 3,4-Dimethyl-3-pyrrolin-2-one     | 111.1              | 0.5                                            | -                       |
| 2,5-Pyrrolidinedione, 1-methyl-   | 113.1              | 0.5                                            | 1                       |
| 2,4-Imidazolidinedione, 5-methyl- | 114.1              | 0.6                                            | -                       |
| Pentanoic acid, 3-methyl-         | 116.2              | 2.1                                            | -                       |

|                                                                                   |       |     |      |
|-----------------------------------------------------------------------------------|-------|-----|------|
| Pentanamide, 5-hydroxy-                                                           | 117.2 | 0.6 | -    |
| Indolizine                                                                        | 117.2 | -   | 0.57 |
| Pyrazine, 2-ethyl-3-methyl-                                                       | 122.2 | -   | 0.69 |
| 2(1H)-Pyridinone, 3,6-dimethyl-                                                   | 123.2 | -   | 0.79 |
| 1-Propanone, 1-(2-furanyl)-                                                       | 124.1 | 0.5 | -    |
| 5,6-Dihydro-6-methyluracil                                                        | 128.1 | 1.1 | 1.46 |
| 5,5-dimethyl-2,4-imidazolidinedione                                               | 128.1 | 6.4 | 1.78 |
| Oxazolidine, 2-ethyl-2,3-dimethyl-                                                | 129.2 | 0.7 | -    |
| DL-Alanine, N-acetyl-                                                             | 131.1 | 0.7 | 0.55 |
| Quinoline, 5,6,7,8-tetrahydro-                                                    | 133.2 | -   | 0.89 |
| Acetamide, N-3-pyridinyl-                                                         | 136.2 | 1.7 | 0.76 |
| dl-5-Ethyl-5-methyl-2,4-                                                          | 142.2 | 2.9 | 0.87 |
| 5-Isopropyl-2,4-imidazolidinedione                                                | 142.2 | 2.4 | -    |
| 6-Amino-1-methylpurine                                                            | 150.2 | 1.0 | 0.6  |
| Acetamide, N-(4-aminophenyl)-                                                     | 150.2 | 0.6 | -    |
| Formamide, N,N-dibutyl-                                                           | 157.3 | 1.9 | -    |
| Uric acid                                                                         | 168.1 | 1.6 | -    |
| Phosphonic acid, (p-hydroxyphenyl)-                                               | 174.1 | 1.0 | -    |
| D-Allose                                                                          | 180.2 | 0.9 | -    |
| Pyrrolo[1,2-a]pyrazine-1,4-dione, hexahydro-3-(2-methylpropyl)-                   | 210.3 | 1.0 | -    |
| 5,10-Diethoxy-2,3,7,8-tetrahydro-1H,6H-dipyrrolo[1,2-a;1',2'-d]pyrazine           | 250.3 | 1.2 | -    |
| Piperazine, 1-[(2,4-dichlorobenzoyl)methyl]-4-methyl-                             | 287.2 | -   | 0.49 |
| Pyrimidine-2,4,6-trione, 1-cyclohexyl-5-[(2-piperazin-1-yl-ethylamino)methylene]- | 349.4 | -   | 0.48 |
| Deoxyspergualin                                                                   | 387.5 | -   | 0.42 |

5

6

7

8 **Table S2.** Average reads and average number of microbial zOTUs observed per digester

|                                                       | <b>MB1</b>   | <b>MB2</b>   | <b>IB1</b>   | <b>IB2</b>   |
|-------------------------------------------------------|--------------|--------------|--------------|--------------|
| <b>Total reads</b>                                    | 332,218      | 314,665      | 355,290      | 367,660      |
| <b>Average ± Standard deviation read per digester</b> | 27,685 ± 677 | 26,222 ± 813 | 29,607 ± 683 | 30,638 ± 855 |
| <b>Observed zOTU</b>                                  | 899 ± 51     | 928 ± 69     | 525 ± 56     | 355 ± 21     |

9

10

- 11 **Table S3.** Average and standard deviation (Avg ± std) of observed OTU, Shannon Index  
 12 (H) and Chao1 value per triplicate digesters

| Sample                        | MB1     |       | MB2     |       | IB1     |       | IB2     |       |
|-------------------------------|---------|-------|---------|-------|---------|-------|---------|-------|
|                               | Shannon | Chao1 | Shannon | Chao1 | Shannon | Chao1 | Shannon | Chao1 |
| Inocula                       | 1062    | 4.7   | 1067    | 4.4   | 528     | 4.3   | 423     | 3.6   |
| Control                       | 1028    | 4.4   | 1069    | 4.6   | 553     | 3.4   | 386     | 3.3   |
| Digester fed non-ozonated APL | 1156    | 4.5   | 1156    | 5.0   | 697     | 3.7   | 432     | 3.3   |
| Digester fed ozonated APL     | 1176    | 4.5   | 1196    | 5.1   | 736     | 3.6   | 428     | 3.4   |

14 **Table S4.** Functions carried out by the identified bacterial taxa described in Section  
 15 3.6.2

| OTU #    | OTU Name               | Taxonomic Level | Function                                                                                                                                                                   | Reference |
|----------|------------------------|-----------------|----------------------------------------------------------------------------------------------------------------------------------------------------------------------------|-----------|
| 7        | Sphingobacteriaceae    | Family          | Involved in hydrolysis of phenolics and polycyclic and monocyclic aromatic hydrocarbons                                                                                    | (1)       |
| 38       | Anaerolineaceae        | Family          | Utilizes carbohydrates and proteinaceous carbon sources and produces hydrogen as a fermentation byproducts                                                                 | (2)       |
| 5        | Clostridicaea          | Family          | Involved in syntrophic acetate oxidation (SAO) along with hydrogenotrophic methanogens and contributes to methane formation in high-ammonia processes                      | (3,4)     |
| 15       | <i>Synergistes</i>     | Genus           | Involved in syntrophic acetate oxidation (SAO) along with hydrogenotrophic methanogens and contributes to methane formation in high-ammonia processes                      | (4,5)     |
| 14       | <i>Cytophaga</i>       | Genus           | Degrades biopolymers such as xylan and cellulose                                                                                                                           | (6)       |
| 3 and 24 | <i>Bellilinea</i>      | Genus           | Found in methanogenic propionate-degrading consortia                                                                                                                       | (7)       |
| 41       | <i>Symbiobacterium</i> | Genus           | Moderately anaerobic, thermophilic and chemo-organotrophic bacteria involved in SAO                                                                                        | (8)       |
| 59       | <i>Acetovibrio</i>     | Genus           | Acetogenic bacteria degrading cellulose and cellobiose                                                                                                                     | (9,10)    |
| 105      | <i>Sedimentibacter</i> | Genus           | Strictly anaerobic bacteria producing acetate and butyrate by utilizing complex substrates including alpha-keto acids and amino acids while carbohydrates are not utilized | (11)      |

16

17

18

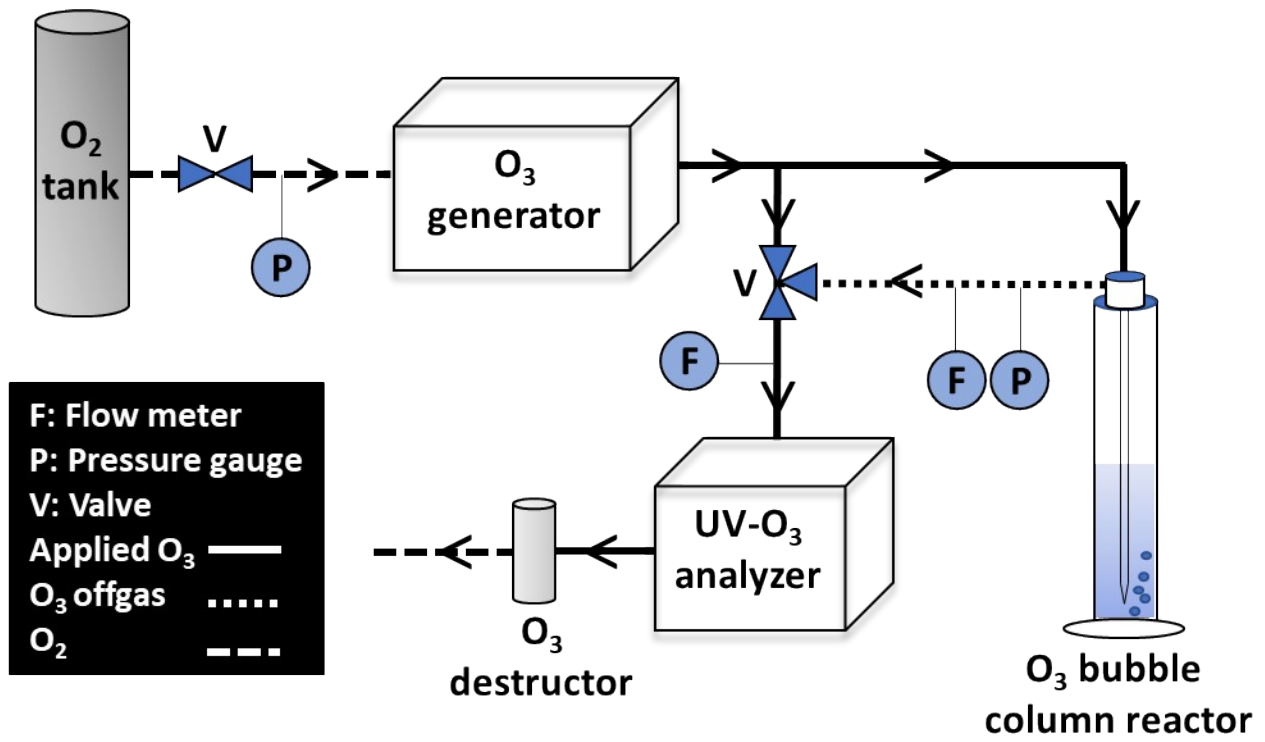

19

20 **Figure S1.** Pre-ozonation Schematic.

A

Municipal biomass no. 1

Municipal biomass no. 2

Industrial biomass no. 1

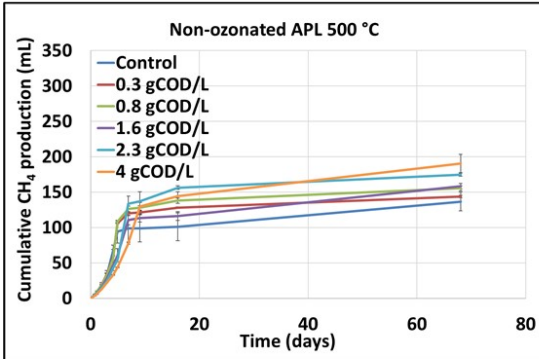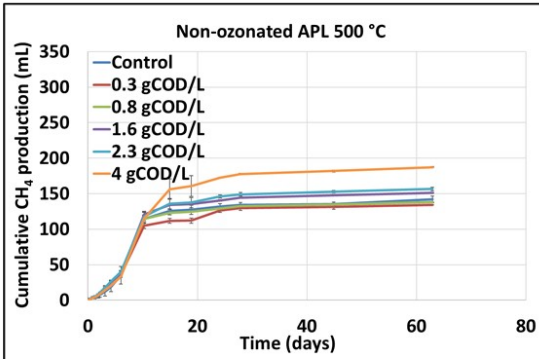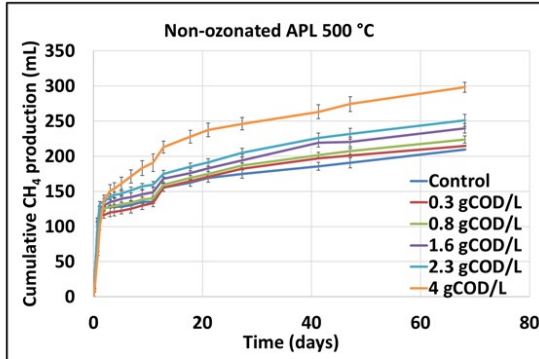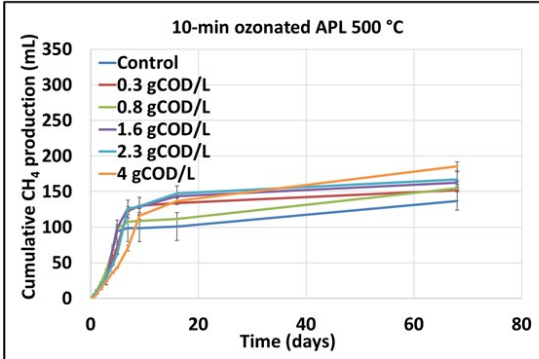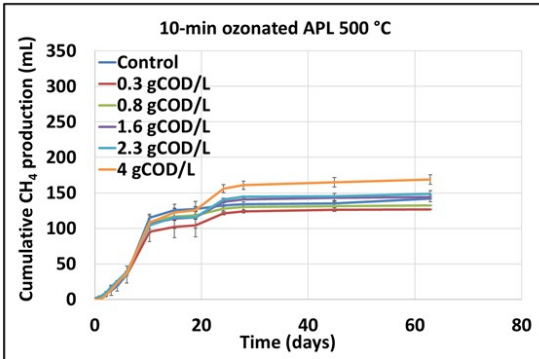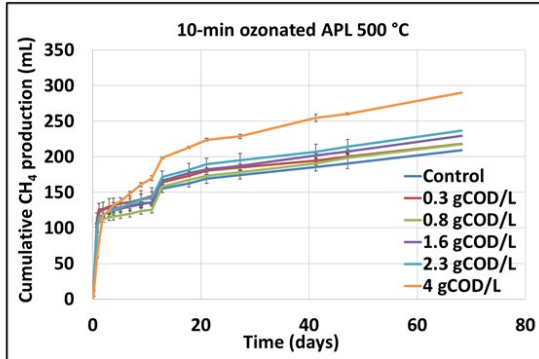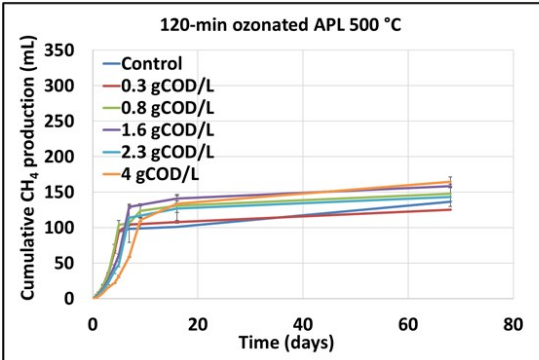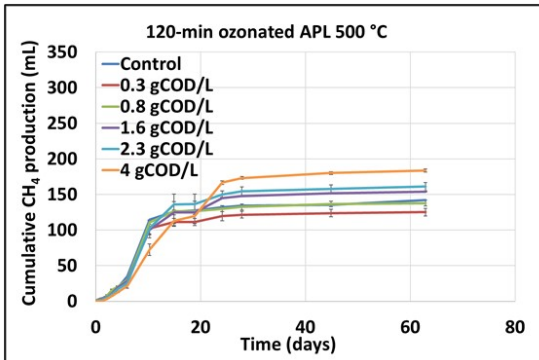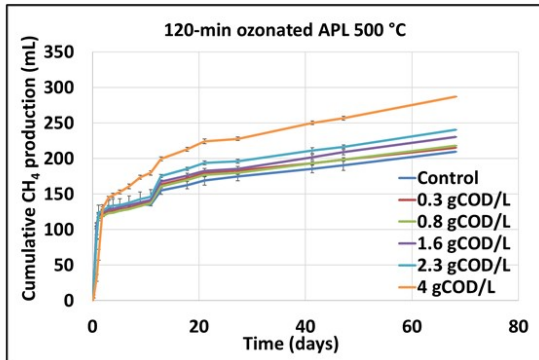

B

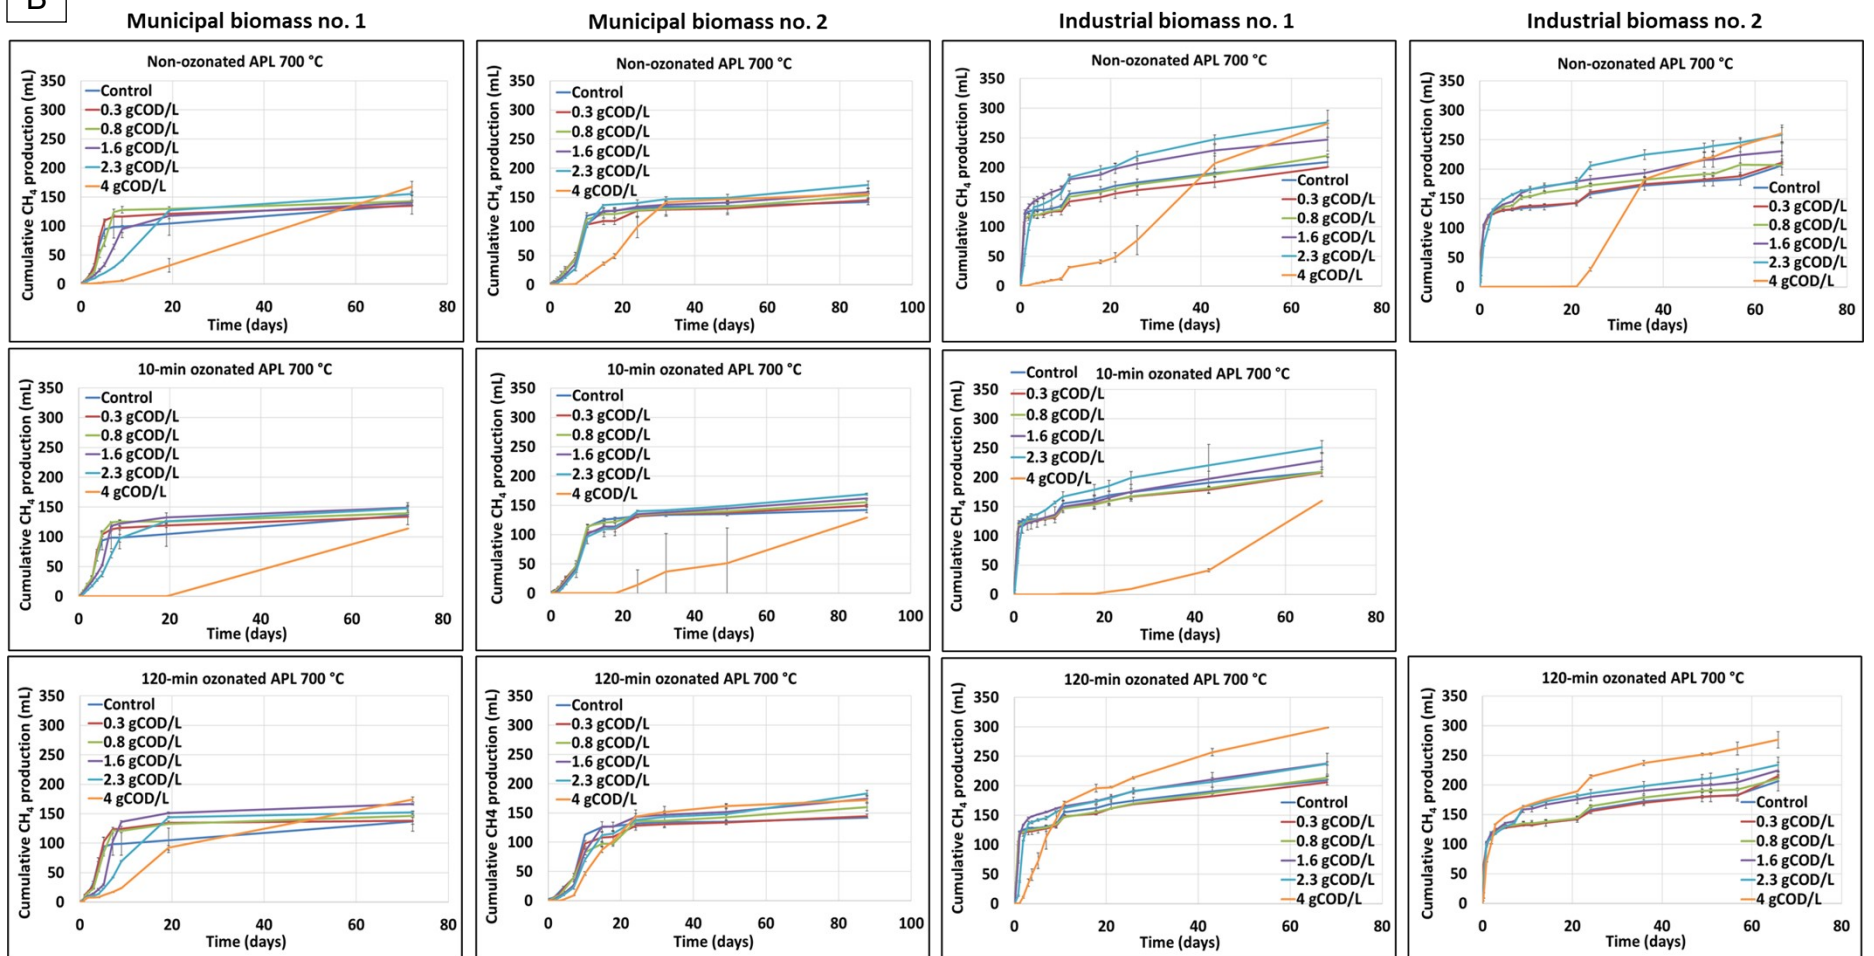

**Figure S2.** Cumulative methane production from ATA on non-ozonated, 10-min ozonated and 2-h ozonated APL using different inocula at different APL COD concentrations. Average values and standard deviations are from triplicates bottles. (A) 500 °C APL, (B) 700 °C APL.



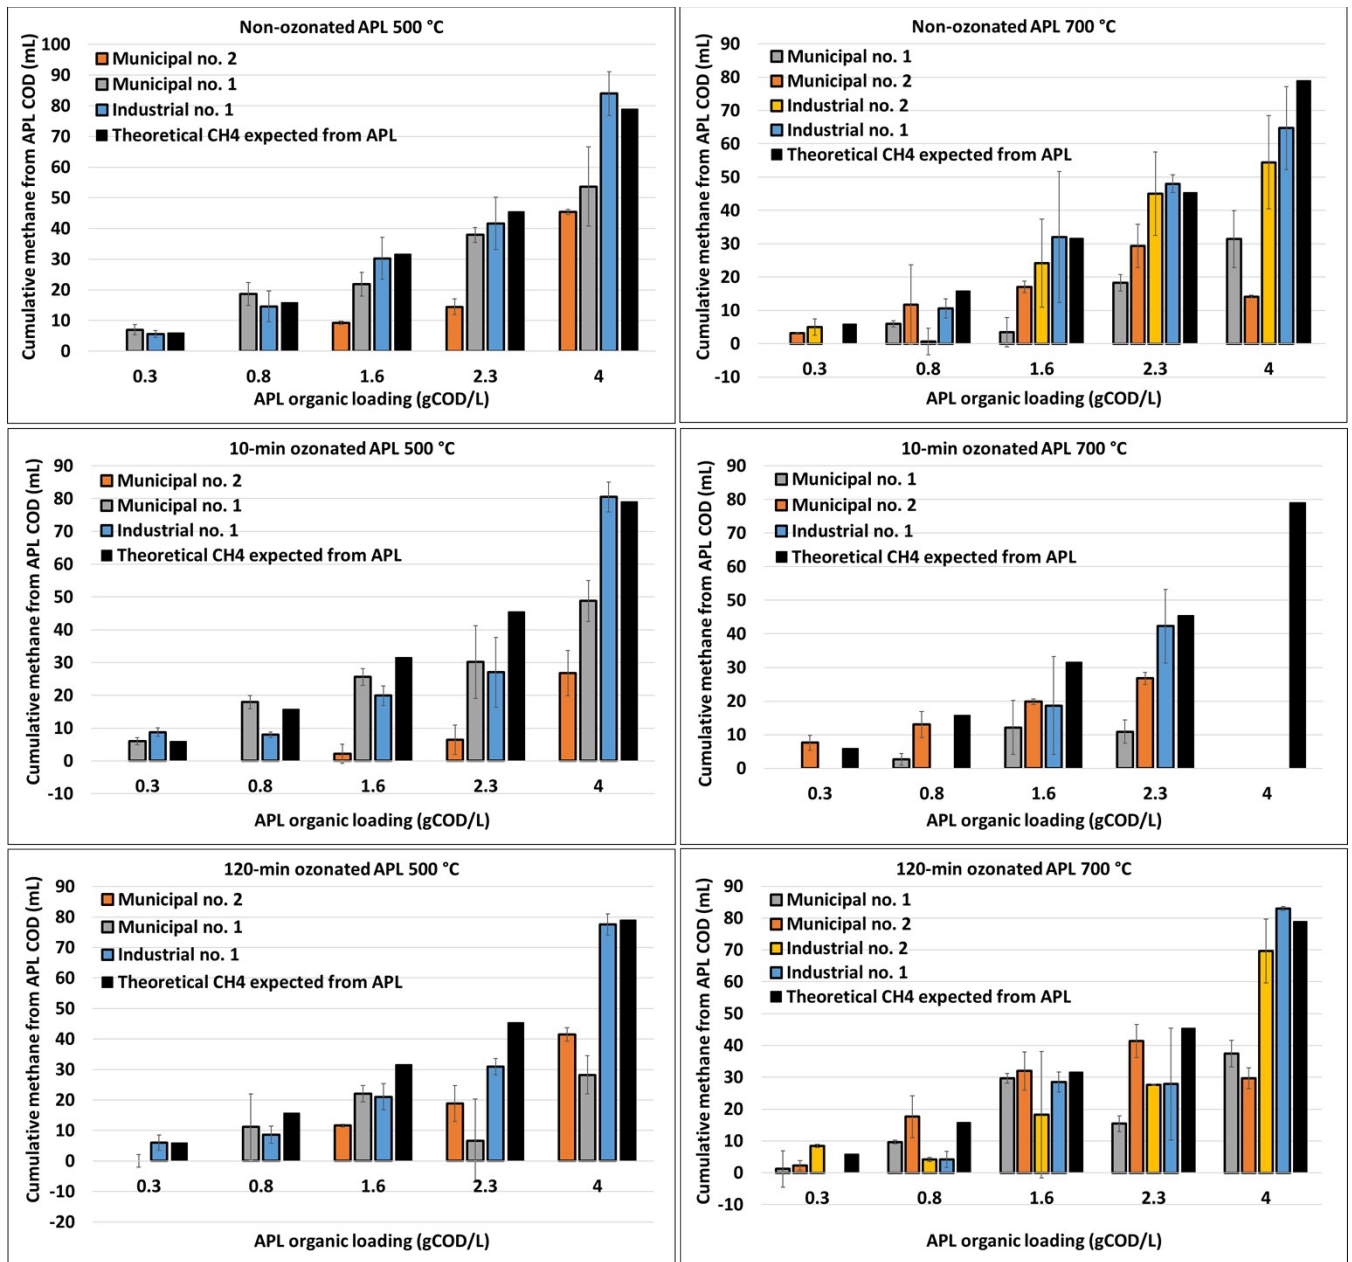

**Figure S3.** Final cumulative methane production from ATAs on non-ozonated, 10-min ozonated and 2-h ozonated APL produced at 500 °C and 700 °C at different concentrations employing different inocula. The black bars show the theoretical stoichiometric methane production (395 mL CH<sub>4</sub> produced per gCOD removed at 35 °C and 1 atm) for comparison to the actual methane produced from APL COD at each concentration. Error bars represent standard deviation from triplicate bottles. Some error bars are small and not visible.

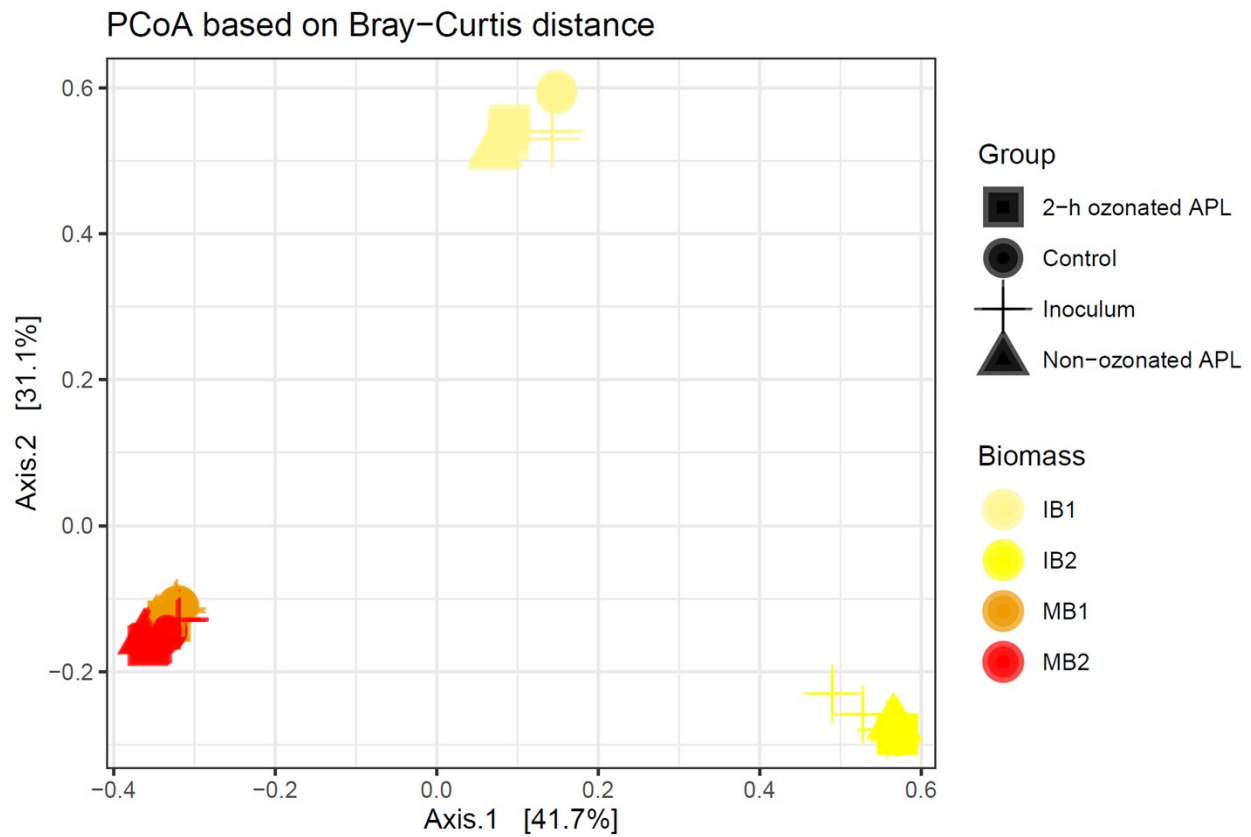

**Figure S4.** PCoA analysis of all four MB1, MB2, IB1 and IB2 biomass. MB1 and MB2 communities clustered closer, exhibiting some similarities whereas IB1 and IB2 communities are clustered further apart demonstrating different communities.

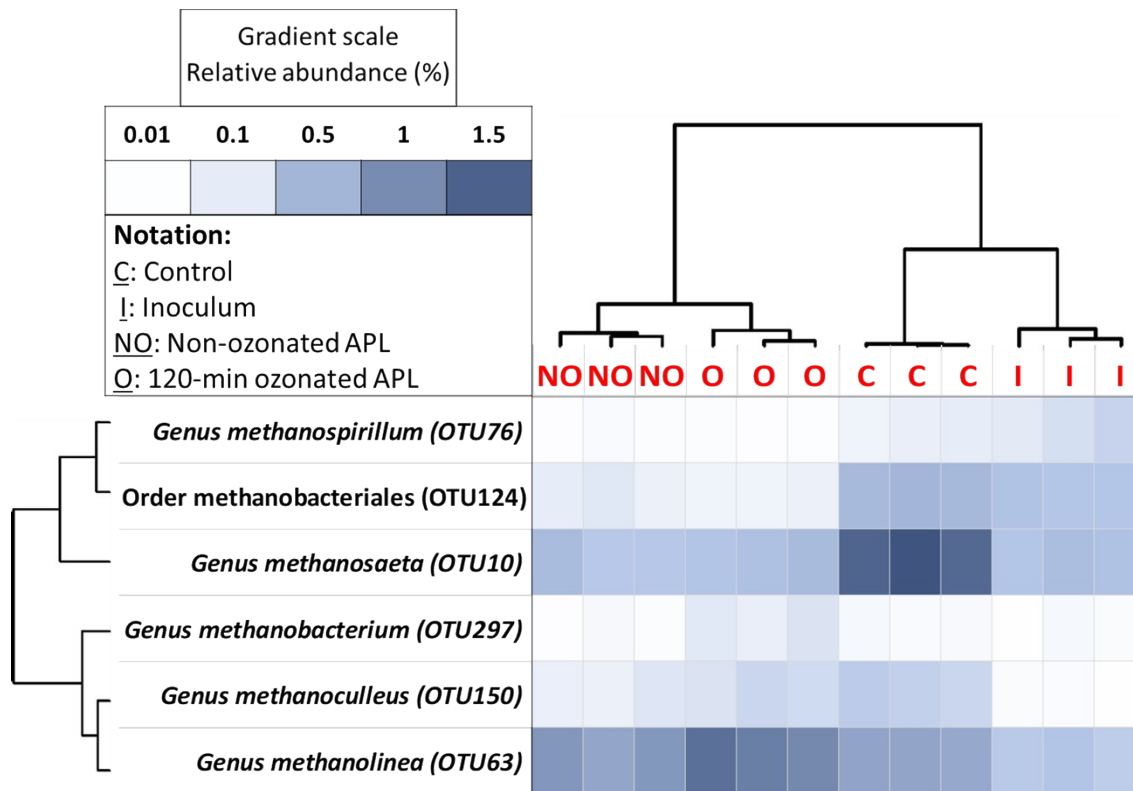

**Figure S5.** Dual hierarchical clustering of the 6 most abundant archaeal OTUs in MB2. These OTUs represent  $86 \pm 5.2\%$  of total archaeal community relative abundance in all MB2-inoculated bottles.

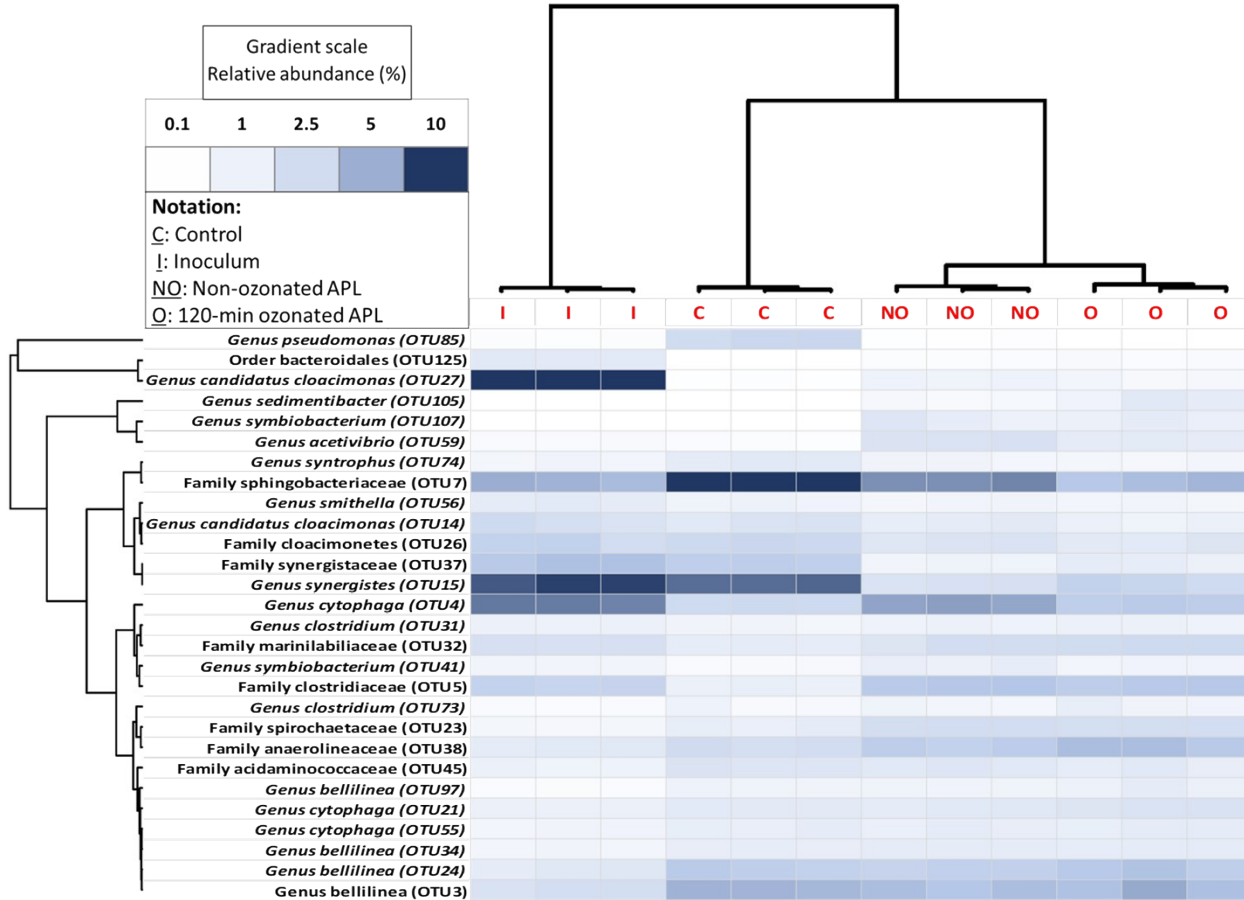

**Figure S6.** Dual hierarchical clustering of the 28 most abundant bacterial OTUs in MB2. These OTUs represent  $58 \pm 5\%$  of the total MB2 bacterial community abundance in all MB2-inoculated bottles.

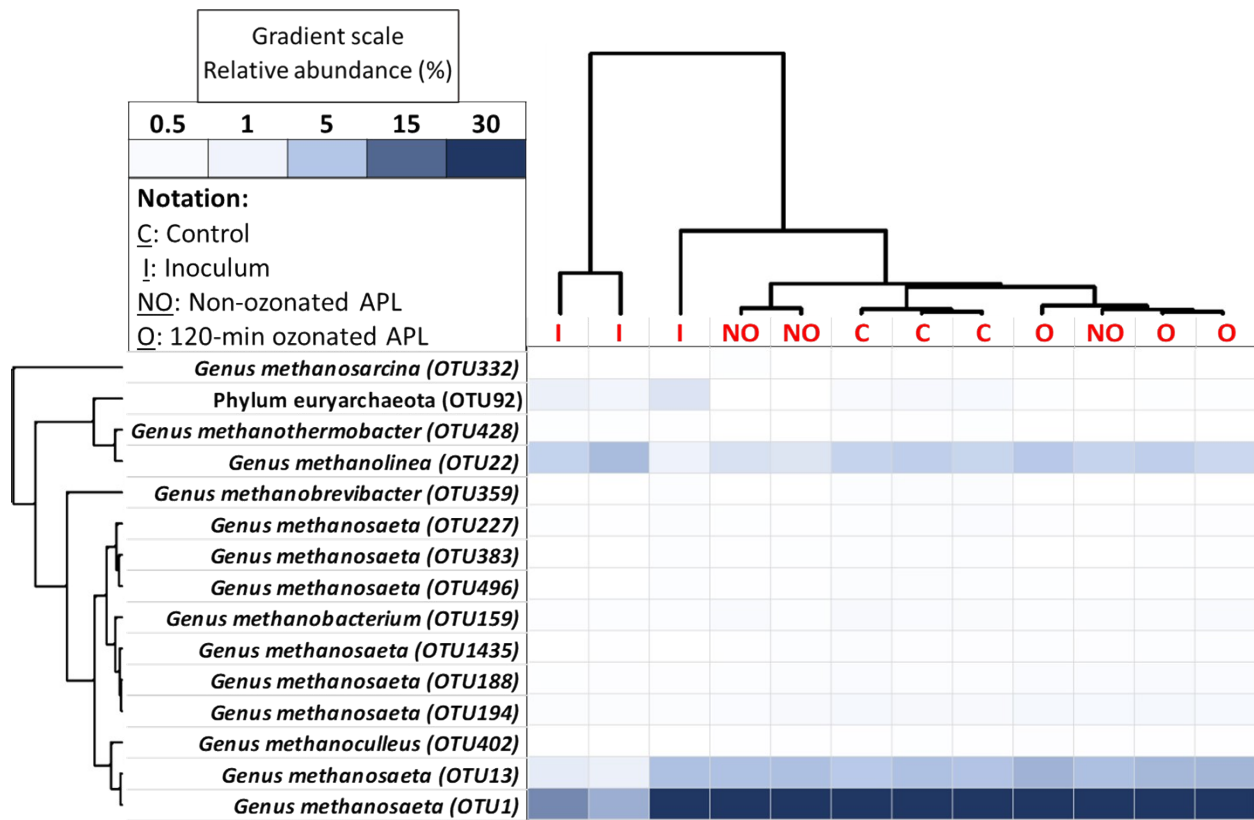

**Figure S7.** Dual hierarchical clustering of the 15 most abundant archaeal OTUs in IB2. These OTUs represent  $99 \pm 0.3\%$  of total archaeal community relative abundance in all IB2-inoculated bottles.

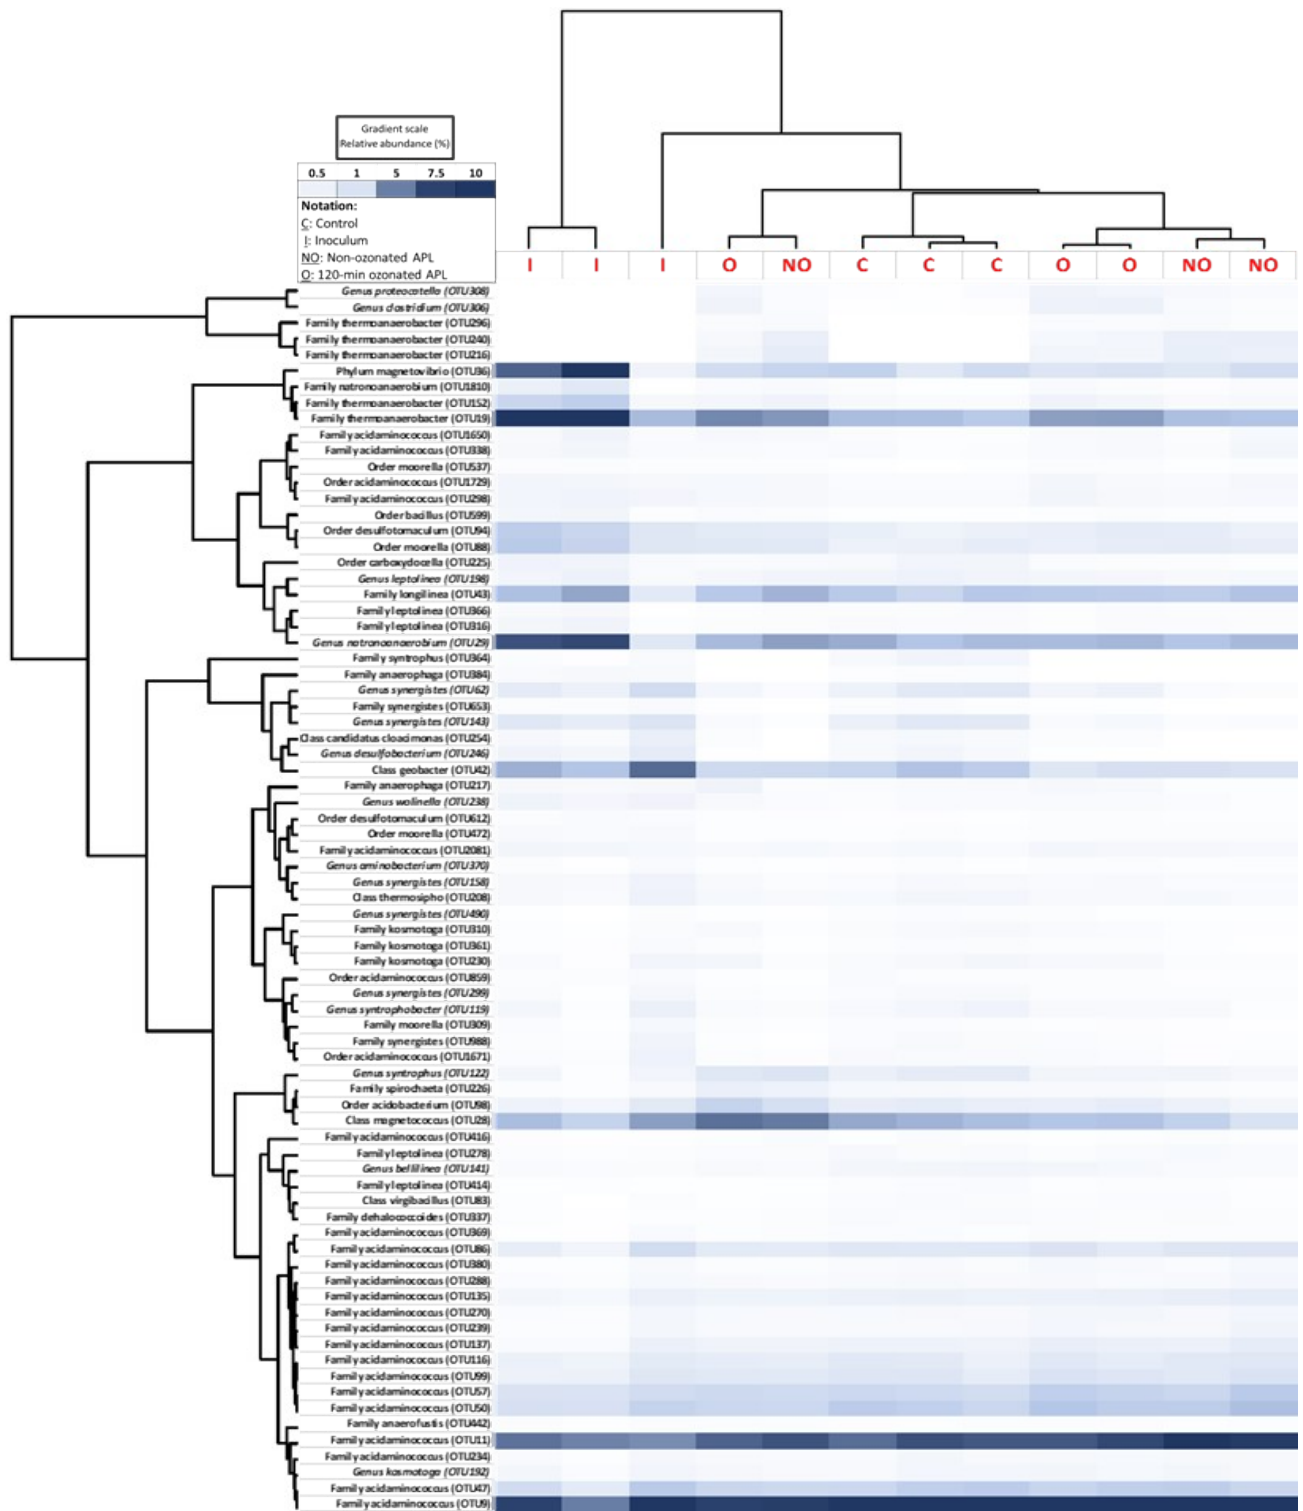

**Figure S8.** Dual hierarchical clustering of the 77 most abundant bacterial OTUs in IB2. These OTUs represent  $89 \pm 2\%$  of the total IB2 bacterial community abundance in all IB2-inoculated bottles.

## References

1. Lin Z, Zhen Z, Wu Z, Yang J, Zhong L, Hu H, et al. The impact on the soil microbial community and enzyme activity of two earthworm species during the bioremediation of pentachlorophenol-contaminated soils. *J Hazard Mater* [Internet]. 2016;301:35–45. Available from: <http://dx.doi.org/10.1016/j.jhazmat.2015.08.034>
2. McIlroy SJ, Kirkegaard RH, Dueholm MS, Fernando E, Karst SM, Albertsen M, et al. Culture-independent analyses reveal novel anaerolineaceae as abundant primary fermenters in anaerobic digesters treating waste activated sludge. *Front Microbiol*. 2017 Jun 23;8(JUN):267340.
3. Li C, Hao L, Lü F, Duan H, Zhang H, He P. Syntrophic Acetate-Oxidizing Microbial Consortia Enriched from Full-Scale Mesophilic Food Waste Anaerobic Digesters Showing High Biodiversity and Functional Redundancy. *mSystems*. 2022;7(5).
4. Westerholm M, Moestedt J, Schnürer A. Biogas production through syntrophic acetate oxidation and deliberate operating strategies for improved digester performance. *Appl Energy* [Internet]. 2016;179:124–35. Available from: <http://dx.doi.org/10.1016/j.apenergy.2016.06.061>
5. Ito T, Yoshiguchi K, Ariesyady HD, Okabe S. Identification of a novel acetate-utilizing bacterium belonging to Synergistes group 4 in anaerobic digester sludge. *ISME J*. 2011;5(12):1844–56.
6. Lebiocka M, Montusiewicz A, Cydzik-Kwiatkowska A. Effect of Bioaugmentation on Biogas Yields and Kinetics in Anaerobic Digestion of Sewage Sludge. *Int J Environ Res Public Health* [Internet]. 2018 Aug 10 [cited 2023 Jul 23];15(8). Available from: </pmc/articles/PMC6121296/>
7. Yamada T, Imachi H, Ohashi A, Harada H, Hanada S, Kamagata Y, et al. *Bellilinea caldifistulae* gen. nov., sp. nov. and *Longilinea arvoryzae* gen. nov., sp. nov., strictly anaerobic, filamentous bacteria of the phylum Chloroflexi isolated from methanogenic propionate-degrading consortia. *Int J Syst Evol Microbiol* [Internet]. 2007 [cited 2020 Sep 26];57:2299–306. Available from: <http://ijs.sgmjournals.org>
8. Shiratori-Takano H, Akita K, Yamada K, Itoh T, Sugihara T, Beppu T, et al. Description of *Symbiobacterium ostreiconchae* sp. nov., *Symbiobacterium turbinis* sp. nov. and *Symbiobacterium terraclitae* sp. nov., isolated from shellfish, emended description of the genus *Symbiobacterium* and proposal of *Symbiobacteriaceae* fam. nov. *Int J Syst Evol Microbiol*. 2014;64:3375–83.
9. Patel GB, Khan AW, Agnew BJ, Colvin JR. Isolation and characterization of an anaerobic, cellulolytic microorganism, *Acetivibrio cellulolyticus* gen. nov., sp. nov. *Int J Syst Bacteriol* [Internet]. 1980 [cited 2023 Aug 6];30(1):179–85. Available from: [https://www.researchgate.net/publication/44052591\\_Isolation\\_and\\_Characterization\\_of\\_an\\_Anaerobic\\_Cellulolytic\\_Microorganism\\_Acetivibrio\\_cellulolyticus\\_gen\\_nov\\_sp\\_nov](https://www.researchgate.net/publication/44052591_Isolation_and_Characterization_of_an_Anaerobic_Cellulolytic_Microorganism_Acetivibrio_cellulolyticus_gen_nov_sp_nov)
10. Blumer-Schuetz SE, Kataeva I, Westpheling J, Ww Adams M, Kelly RM. Extremely thermophilic microorganisms for biomass conversion: status and prospects. *Curr*

Opin Biotechnol [Internet]. 2008 [cited 2023 Aug 6];19:210–7. Available from: [www.sciencedirect.com](http://www.sciencedirect.com)

11. Sposob M, Moon H-S, Lee D, Kim T-H, Yun Y-M. Comprehensive analysis of the microbial communities and operational parameters of two full-scale anaerobic digestion plants treating food waste in South Korea: Seasonal variation and effect of ammonia. 2020 [cited 2023 Aug 6]; Available from: <https://doi.org/10.1016/j.jhazmat.2020.122975>
