# Supplementary figures and images for: Improved methanogenesis from aqueous pyrolysis liquid (APL) by inoculum selection and pre-ozonation
Source: Royal Society of Chemistry journal article supplement (doi:10.1039/d3ew00768e), 2024-01-01

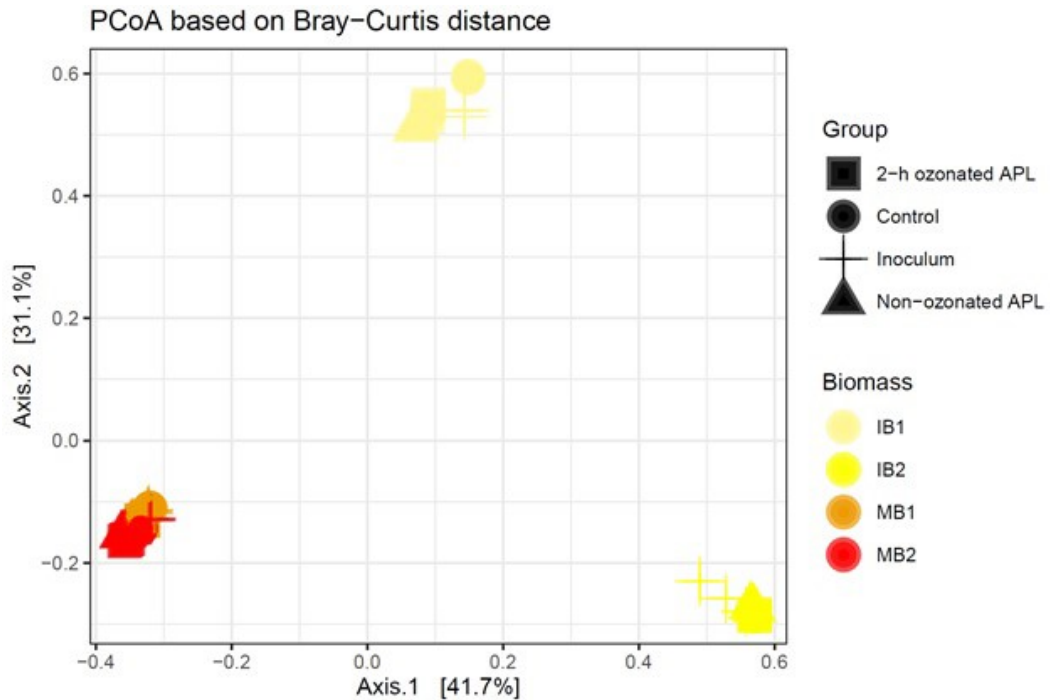

Supplement: d3ew00768e2.pdf [file d3ew00768e2.pdf]
